# Supplementary material
Source: publisher site journal article supplement (https://www.dovepress.com/article/288067)
Supplement: Supplementary file 1 [file get_supplementary_file.php]

**Additional file 1**

**The questionnaire used in this study**

**Instruction**: Encircle the number/letter that indicates an appropriate answer of the participant if choices are given. Otherwise, put the numbers that indicate an appropriate answer of the participant at the end of each statement.

### Part one-Socio demographic characteristics

| **Code** | **Questions** | **Responses** |
| --- | --- | --- |
| 101. | Age of the respondent in years |  |
| 102. | Sex | 1. Male 2. Female |
| 103. | Residence | 1. Urban 2. Rural |
| 104. | Religion | 1. Orthodox Tewahido 2. Muslim 3. Protestant 4. Catholic 5. Other (specify) ____________ |
| 105. | Ethnicity | 1. Bench 2. Sheko 3. Oromo 4. Amhara 5. Kafa 6. Other (specify) ____________ |
| 106. | Educational level | 1. Cannot read and write 2. Can read and write 3. Primary (grade 1-8) 4. Secondary or preparatory 5. Diploma and above |
| 107. | Occupation | 1. Unemployed 2. Farmer 3. Daily labor 4. Merchant 5. Government Employee 6. Private Business 7. Others(specify) ____________ |
| 108. | Marital Status | 1. Single 2. Married 3. Divorced 4. Widowed 5. Separated |
| 109. | Family size (number of people in the household) | ____________ |

### Part Two-Knowledge questions

| K1. The main clinical symptoms of COVID-19 are fever, fatigue, dry cough, and myalgia. |  |
| --- | --- |
| K2. Unlike the common cold, stuffy nose, runny nose, and sneezing are less common in persons infected with the COVID- 19 virus. |  |
| K3. Currently, there is no effective cure for COVID-2019, but early symptomatic and supportive treatment can help most patients recover from the infection. |  |
| K4. Not all persons with COVID-2019 will develop to severe cases. Only those who are elderly, have chronic illnesses, and are obese are more likely to be severe cases. |  |
| K5. Eating or contacting wild animals would result in the infection by the COVID-19 virus. |  |
| K6. Persons with COVID-19 cannot infect the virus to others without symptoms present. |  |
| K7. The COVID-19 virus spreads via respiratory droplets (coughing, sneezing) of infected individuals. |  |
| K8. Ordinary residents can wear general medical masks to prevent the infection by the COVID-19 virus. |  |
| K9. Children and young adults don't need to take measures to prevent the infection by the COVID-19 virus. |  |
| K10. To prevent the infection by COVID-19 individuals should avoid going to crowded places such as bus stations and avoid taking public transportations. |  |
| K11. Isolation and treatment of people who are infected with the COVID-19 virus are effective ways to reduce the spread of the virus. |  |

1. True 2. False 3. I don't know

| K12. People who have contact with someone infected with the COVID-19 virus should be immediately isolated in a proper place. In general, the observation period is 14 days. |  |
| --- | --- |
| K13. To prevent the infection by COVID-19 individuals should wash hands using soap and hand sanitizer. |  |
| K14. To prevent the infection by COVID-19 individuals should Cover mouth and nose while sneezing and coughing. |  |

### Part Three-Attitude questions

### Yes 2. No

| **Attitudes** | |
| --- | --- |
| A1. Do you think that COVID-19 will finally be successfully controlled? |  |
| A2. Do you have confidence that Ethiopia can win the battle against the COVID- 19? |  |
| A3. Do you think traditional medicine can prevent/treat COVID-19? |  |
| A4. Do you think coronavirus can’t survive in areas like Bench Sheko, West Omo and Kafa zones? |  |
| A5. Do you think coronavirus can’t survive in hot areas? |  |
| A6. Do you think coronavirus can be treated by hot beverages like ‘Chemo’, soup, tea and coffee? |  |
| A7. Do you think COVID-19 doesn’t affect youngsters? |  |
| A8. Do you think keeping a physical distance is essential to prevent COVID-19? |  |
| A9. Do you think washing hands with soap and water helps to prevent COVID- 19? |  |

### Part Four-Practice question

### Yes 2. No

| P1. In recent days, have you gone to any crowded place? |  |
| --- | --- |
| P2. In recent days, have you worn a mask when leaving home? |  |
| P3. In recent days, have you washed your hands with soap and water frequently or using alcohol used hand sanitizers?(6 times and above/day) |  |
| P4. In recent days, have you a habit of touching your eye, nose and mouse? |  |
| P5. In recent days, have you covered your mouth and nose when coughing and sneezing? |  |
| P6. In recent days, have you practiced maintaining your distance at 2 meters? |  |
| P7. In recent days, have you eaten raw/uncooked foods? |  |
| P8. In recent days, have you shaken the hands of others? |  |

**Part Five-Questions related to intention to seek care for COVID-19**

**A. Household head’s Perceived susceptibility to COVID 19**

1. Do you think that you are at risk of contracting COVID 19 infection?

A. Yes B. No C. I don’t know

1. Do you think that your families are at risk of contracting COVID 19 infection?

A. Yes B. No C. I don’t know

**B. Household head’s Perceived severity to COVID 19**

1. Do you think COVID 19 is like an ordinary flue for young people

A. Yes

B. No

C. Don’t know

1. Do you think that you are at risk of developing severe morbidity (serious health problems) due to COVID 19 infection?
2. Yes
3. No
4. I don’t know
5. Do you think that you are at risk of death due to COVID 19 infection?
6. Yes B. no C. I don’t know

**C. Household head’s intention to seek care for symptoms related to COVID 19**

1. Staying and treat at home 2. Visit health facility 3. Visit traditional, community leaders, friend 4. Nothing I do

| Item | Response |
| --- | --- |
| 1. What would you do if you think that you have a fever? |  |
| 1. What would you do if you think that you have a cough? |  |
| 1. What would you do if you think that you have muscle ache/fatigue? |  |
| 1. What would you do if you think that you have a difficulty of breathing? |  |
| 1. What would you do if you think that you have a sore throat? |  |
| 1. What would you do if you think that you have a headache? |  |
| 1. What would you do if you think that you have nausea? |  |
| 1. What would you do if you think that you have diarrhea? |  |
